# Supplementary material
Source: PubMed Central journal article supplement (PMC7361838)
Supplement: PCN-74-505-s006.pdf [file PCN-74-505-s006.pdf]

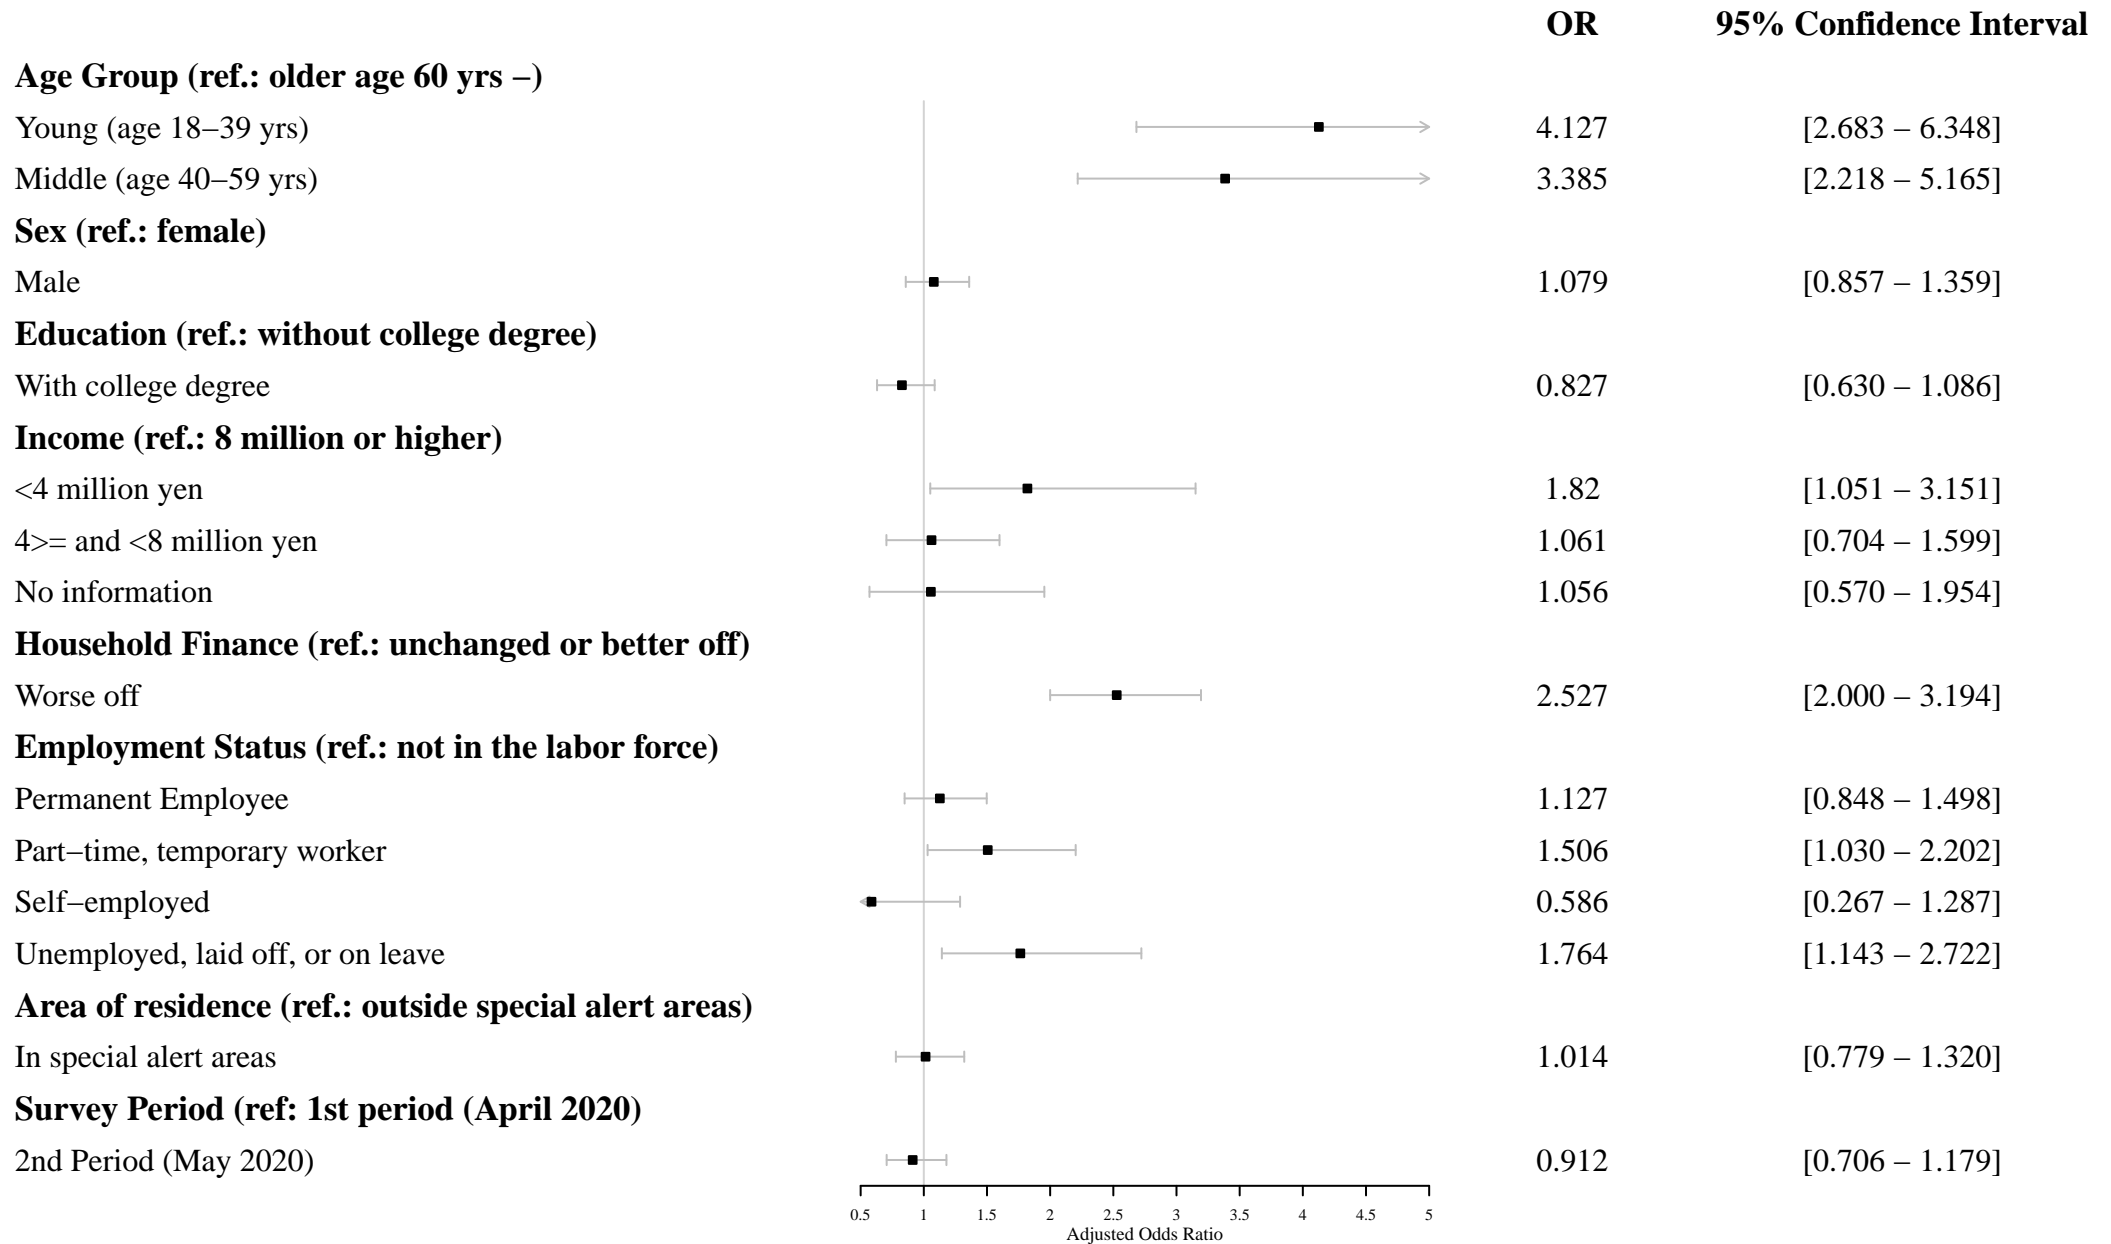

Notes: n=2,000. PHQ-9: the 9-item Patient Health Questionnaire. The outcome is a dummy variable for at least moderate form of depression (cutoff: PHQ-9 score of 10 or higher). Adjusted odds ratios and 95% confidence intervals from multivariate logistic regression with all covariates reported.
